# Supplementary material for: Synergistic effect of donors on tetracyanobutadine (TCBD) substituted ferrocenyl pyrenes
Source: Royal Society of Chemistry journal article supplement (doi:10.1039/c5ra11433k), 2015-01-01
Supplement: c5ra11433k1.pdf [file c5ra11433k1.pdf]

**Supporting Information**

**Synergistic effect of donors on the tetracyanobutadine (TCBD)  
substituted ferrocenyl pyrenes**

*Bhausahab Dhokale, Thaksen Jadhav, Shaikh M. Mobin, and Rajneesh Misra\**

\*E-mail: [rajneeshmisra@iiti.ac.in](mailto:rajneeshmisra@iiti.ac.in)

*Department of Chemistry,  
Indian Institute of Technology Indore,  
Indore- 452 017, India.*

## Table of Contents

|             |                                                                               |            |
|-------------|-------------------------------------------------------------------------------|------------|
| <b>I.</b>   | <b>Photophysical Data</b> .....                                               | <b>S3</b>  |
| <b>II.</b>  | <b>Electrochemical Data</b> .....                                             | <b>S3</b>  |
| <b>III.</b> | <b>Crystallographic data</b> .....                                            | <b>S5</b>  |
| <b>IV.</b>  | <b>Theoretical Calculations</b> .....                                         | <b>S7</b>  |
| <b>V.</b>   | <b>Copies of <sup>1</sup>H NMR, <sup>13</sup>C NMR and HRMS Spectra</b> ..... | <b>S16</b> |
|             | <b>References</b> .....                                                       | <b>S24</b> |

## Photophysical Data

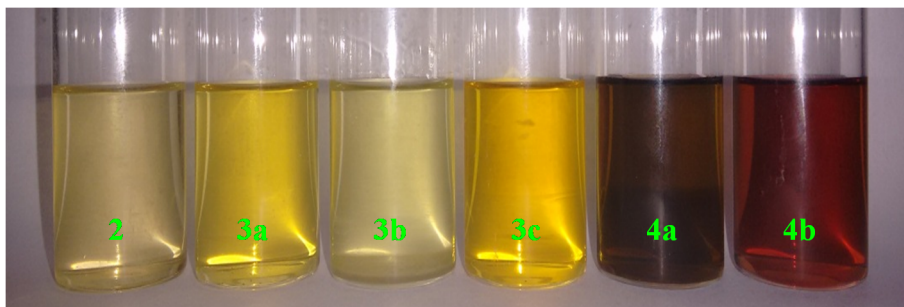

**Figure S1** Photographs of ferrocenyl substituted pyrenes **2**, **3a – 3c**, **4a** and **4b** in  $10^{-4}$  M dichloromethane solution in day light.

## Electrochemical Data

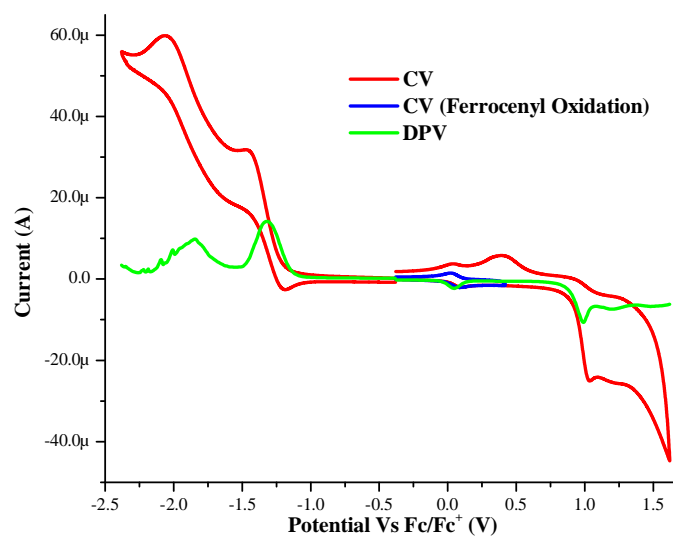

**Figure S2** Overlaid CV and DPV plots of ferrocenyl pyrene **2**.

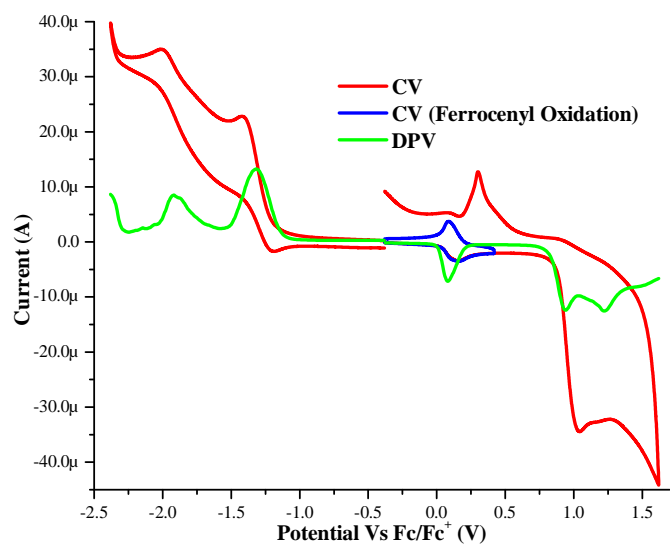

**Figure S3** Overlaid CV and DPV plots of ferrocenyl pyrene **3a**.

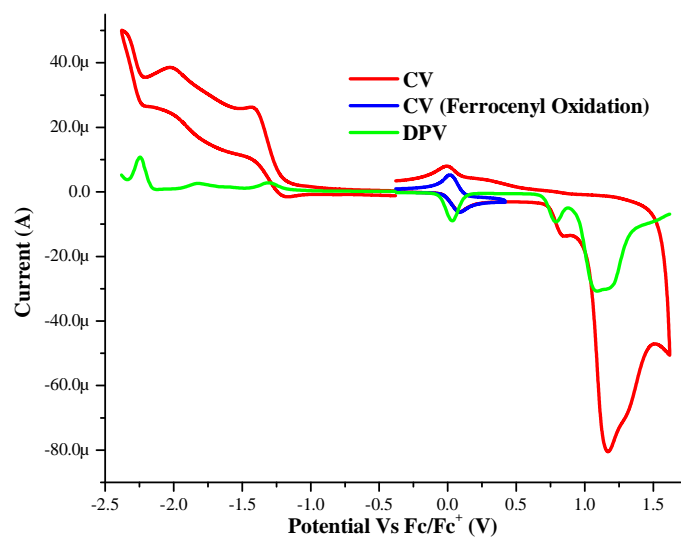

**Figure S4** Overlaid CV and DPV plots of ferrocenyl pyrene **3b**.

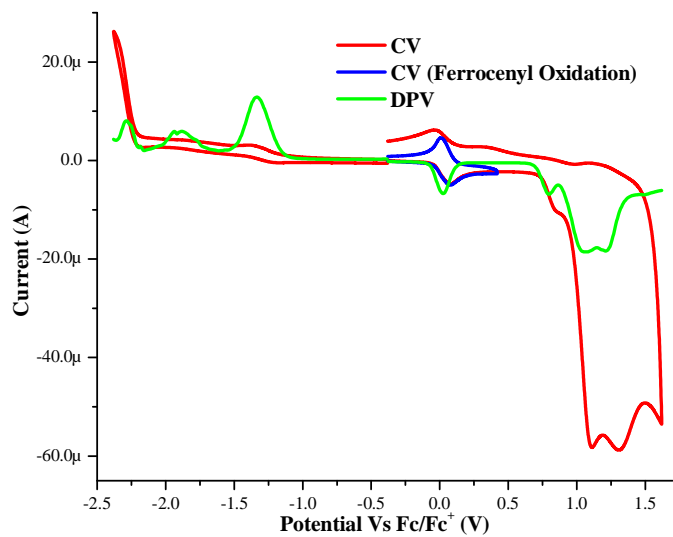

**Figure S5** Overlaid CV and DPV plots of ferrocenyl pyrene **3c**.

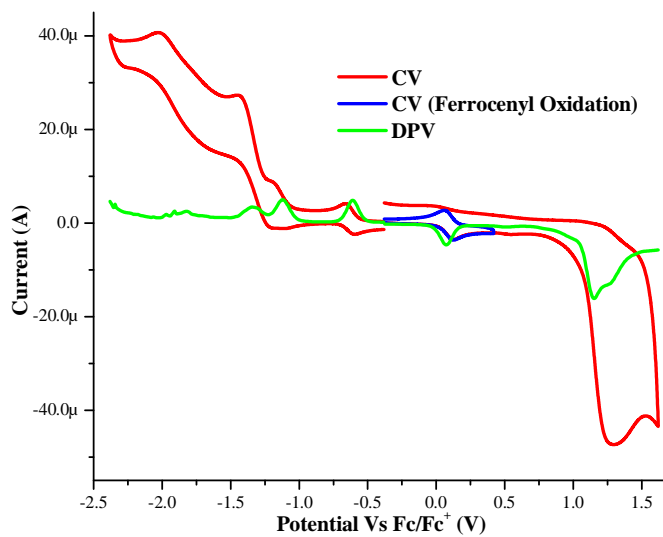

**Figure S6** Overlaid CV and DPV plots of ferrocenyl pyrene **4b**.

### Single Crystal X-ray Diffraction Studies.

Single crystal X-ray structural studies of ferrocenyl substituted pyrene **3b** were performed on a CCD Agilent Technologies (Oxford Diffraction) SUPER NOVA diffractometer. Data were collected at 293(2) K using graphite-monochromated Mo K $\alpha$  radiation ( $\lambda_{\alpha} = 0.71073 \text{ \AA}$ ). The strategy for the Data collection was evaluated by using the CrysAlisPro CCD software. The data were collected by the standard 'phi-omega scan techniques, and were scaled and reduced using CrysAlisPro RED software. The structures were solved by direct methods using SHELXS-97, and refined by full matrix least-squares with SHELXL-97, refining on  $F^2$ . The positions of all the atoms were obtained by direct methods. All non-hydrogen atoms were refined anisotropically. The remaining hydrogen atoms were placed in geometrically constrained positions, and refined with isotropic temperature factors, generally  $1.2U_{eq}$  of their parent atoms. The crystal, and refinement data are summarized in Table 1. The CCDC numbers 1054932 for **3b** contains the supplementary crystallographic data. These data can be obtained free of charge via [www.ccdc.cam.ac.uk/conts/retrieving.html](http://www.ccdc.cam.ac.uk/conts/retrieving.html) (or from the Cambridge Crystallographic Data Centre, 12 union Road, Cambridge CB21 EZ, UK; Fax: (+44) 1223-336-033; or [deposit@ccdc.cam.ac.uk](mailto:deposit@ccdc.cam.ac.uk)).

**Table S1.** Crystal data and structure refinement parameters

| <b>BODIPY</b>                                                | <b>3b</b>                                                          |
|--------------------------------------------------------------|--------------------------------------------------------------------|
| Empirical formula                                            | C <sub>34</sub> H <sub>22</sub> Fe                                 |
| Formula weight                                               | 486.37                                                             |
| Temperature/K                                                | 150(2)                                                             |
| Crystal system                                               | Monoclinic                                                         |
| Space group                                                  | <i>P</i> 21/ <i>n</i>                                              |
| Unit cell dimensions                                         |                                                                    |
| a/Å                                                          | a = 7.7281(2)                                                      |
| $\alpha$ /°                                                  | 90                                                                 |
| b/Å                                                          | b = 10.2249(3)                                                     |
| $\beta$ /°                                                   | 90.696(3)                                                          |
| c/Å                                                          | c = 29.6634(12)                                                    |
| $\gamma$ /°                                                  | 90                                                                 |
| Volume/ Å <sup>3</sup>                                       | 2343.80(13)                                                        |
| Z                                                            | 4                                                                  |
| Calculated density/ Mg/m <sup>3</sup>                        | 1.378                                                              |
| Absorption coefficient/mm <sup>-1</sup>                      | 0.665                                                              |
| <i>F</i> (000)                                               | 1008                                                               |
| Crystal size/mm                                              | 0.26 x 0.21 x 0.18                                                 |
| $\theta$ range from data collection/°                        | 3.30 to 24.99                                                      |
| Reflections collected/unique                                 | 16811 / 4114<br>[ <i>R</i> (int) = 0.0372]                         |
| Absorption correction                                        | Semi-empirical from<br>equivalents                                 |
| Data/restraints/parameters                                   | 4114 / 0 / 316                                                     |
| Goodness-of-fit on <i>F</i> <sup>2</sup>                     | 1.069                                                              |
| Final <i>R</i> indices [ <i>I</i> > 2 $\sigma$ ( <i>I</i> )] | <i>R</i> <sub>1</sub> = 0.0353,<br><i>wR</i> <sub>2</sub> = 0.0817 |
| <i>R</i> indices (all data)                                  | <i>R</i> <sub>1</sub> = 0.0493,<br><i>wR</i> <sub>2</sub> = 0.0895 |
| Largest diff. peak and hole/e Å <sup>-3</sup>                | 0.256 and -0.259                                                   |
| CCDC number                                                  | 1054932                                                            |

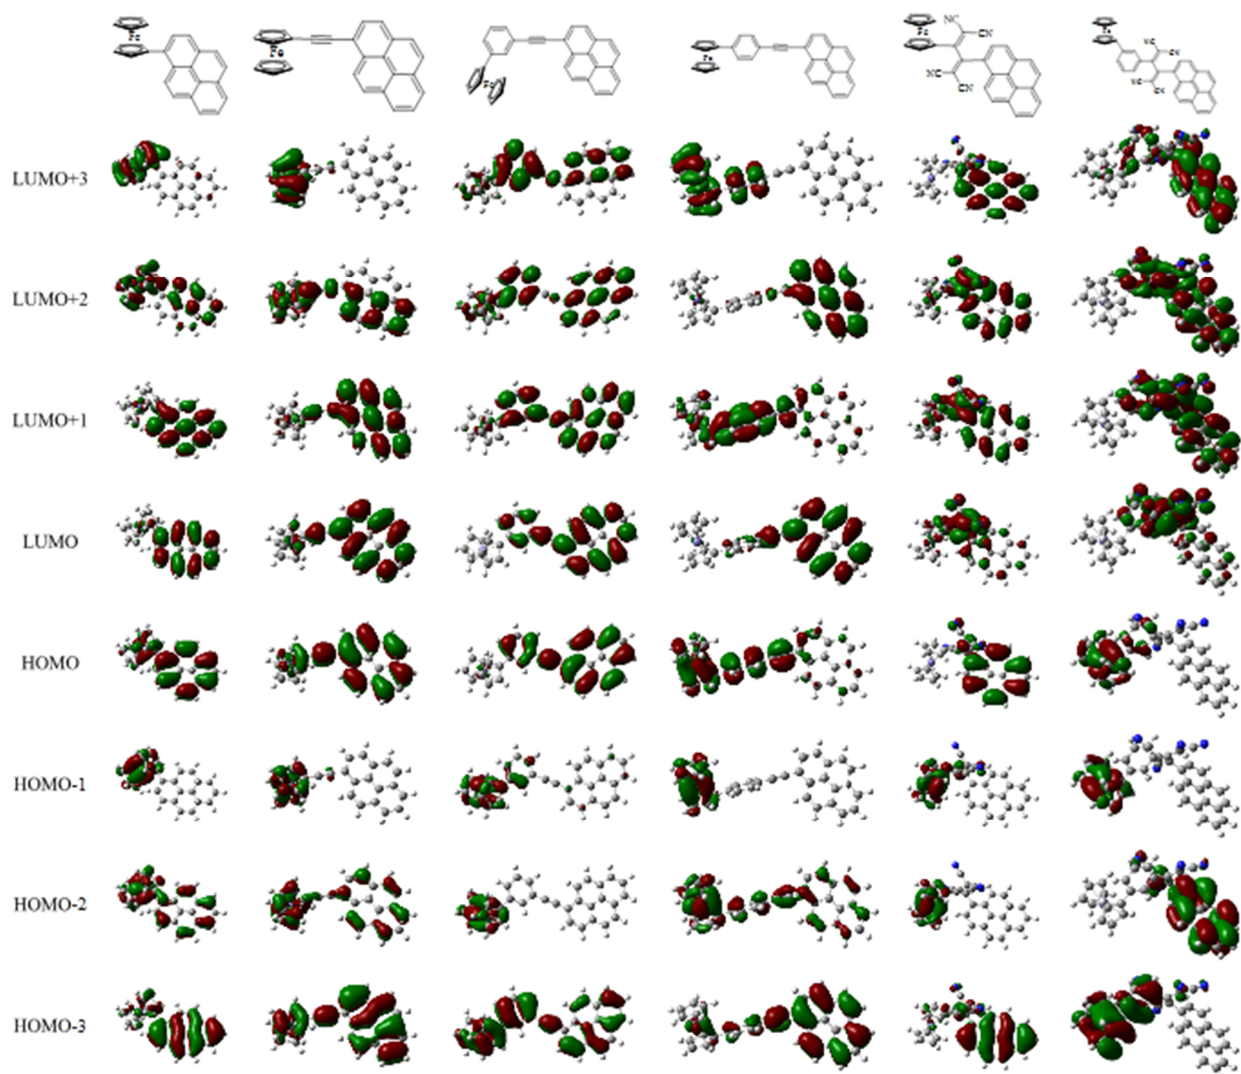

**Figure S7** Frontier molecular orbital plots of ferrocenyl substituted pyrenes **2**, **3a – 3c**, **4a**, and **4b** calculated at B3LYP/6-31G\* level for C, N, H and Lan12DZ level for Fe<sup>i</sup>

Ferrocenyl substituted pyrene **2**

Standard orientation:

| Center Number | Atomic Number | Atomic Type | Coordinates (Angstroms) |           |           |
|---------------|---------------|-------------|-------------------------|-----------|-----------|
|               |               |             | X                       | Y         | Z         |
| 1             | 6             | 0           | -4.882346               | -0.020568 | 1.370280  |
| 2             | 26            | 0           | -3.265234               | -0.190156 | 0.073917  |
| 3             | 6             | 0           | -5.102465               | 0.777197  | 0.207120  |
| 4             | 6             | 0           | -3.692767               | 0.446463  | 2.007511  |
| 5             | 6             | 0           | -4.048621               | 1.737499  | 0.125437  |
| 6             | 6             | 0           | -3.178025               | 1.532973  | 1.238992  |
| 7             | 6             | 0           | -3.024154               | -2.205621 | -0.340623 |



|    |   |   |           |           |           |
|----|---|---|-----------|-----------|-----------|
| 8  | 6 | 0 | -1.810359 | -1.666562 | 0.181398  |
| 9  | 6 | 0 | -1.355236 | -0.624627 | -0.696554 |
| 10 | 6 | 0 | -2.325689 | -0.519423 | -1.751407 |
| 11 | 1 | 0 | -5.906575 | 0.653149  | -0.505194 |
| 12 | 1 | 0 | -3.242324 | 0.029636  | 2.897773  |
| 13 | 1 | 0 | -3.921637 | 2.473074  | -0.657254 |
| 14 | 1 | 0 | -2.263380 | 2.073443  | 1.439444  |
| 15 | 6 | 0 | -3.342653 | -1.495022 | -1.536610 |
| 16 | 1 | 0 | -3.618909 | -2.985862 | 0.114085  |
| 17 | 1 | 0 | -1.329804 | -1.963618 | 1.103056  |
| 18 | 1 | 0 | -2.278505 | 0.183744  | -2.571795 |
| 19 | 1 | 0 | -4.215718 | -1.648779 | -2.155841 |
| 20 | 1 | 0 | -5.490107 | -0.855034 | 1.692184  |
| 21 | 6 | 0 | -0.121865 | 0.188633  | -0.586470 |
| 22 | 6 | 0 | 1.149309  | -0.393284 | -0.333549 |
| 23 | 6 | 0 | -0.201567 | 1.577647  | -0.779298 |
| 24 | 6 | 0 | 2.299609  | 0.455008  | -0.216609 |
| 25 | 6 | 0 | 1.352830  | -1.814378 | -0.217140 |
| 26 | 6 | 0 | 0.912344  | 2.400078  | -0.686545 |
| 27 | 1 | 0 | -1.174314 | 2.014037  | -0.981548 |
| 28 | 6 | 0 | 3.584849  | -0.104544 | 0.065021  |
| 29 | 6 | 0 | 2.175529  | 1.867229  | -0.387488 |
| 30 | 6 | 0 | 2.579453  | -2.345677 | 0.042547  |
| 31 | 1 | 0 | 0.505651  | -2.473790 | -0.360249 |
| 32 | 1 | 0 | 0.808419  | 3.472659  | -0.829434 |
| 33 | 6 | 0 | 3.738325  | -1.516541 | 0.210181  |
| 34 | 6 | 0 | 4.727801  | 0.744565  | 0.198598  |
| 35 | 6 | 0 | 3.340419  | 2.695753  | -0.251463 |
| 36 | 1 | 0 | 2.700749  | -3.423422 | 0.117241  |
| 37 | 6 | 0 | 5.008499  | -2.045902 | 0.491033  |
| 38 | 6 | 0 | 5.977907  | 0.170315  | 0.482761  |
| 39 | 6 | 0 | 4.559674  | 2.161508  | 0.032867  |
| 40 | 1 | 0 | 3.225534  | 3.768940  | -0.380685 |
| 41 | 6 | 0 | 6.114223  | -1.208948 | 0.628181  |
| 42 | 1 | 0 | 5.120529  | -3.121590 | 0.598975  |
| 43 | 1 | 0 | 6.844472  | 0.818080  | 0.586433  |
| 44 | 1 | 0 | 5.432372  | 2.801266  | 0.135316  |
| 45 | 1 | 0 | 7.089473  | -1.634524 | 0.846638  |

-----  
Total energy (Sum of electronic and zero-point energies):

-1125.1046585 Hartree

**Ferrocenyl substituted pyrene 3a**

Standard orientation:

| Center<br>Number | Atomic<br>Number | Atomic<br>Type | Coordinates (Angstroms) |           |          |
|------------------|------------------|----------------|-------------------------|-----------|----------|
|                  |                  |                | X                       | Y         | Z        |
| 1                | 6                | 0              | 5.766782                | 0.094399  | 1.533783 |
| 2                | 26               | 0              | 4.287638                | -0.183476 | 0.098395 |

|    |   |   |           |           |           |
|----|---|---|-----------|-----------|-----------|
| 3  | 6 | 0 | 5.381088  | -1.279355 | 1.486795  |
| 4  | 6 | 0 | 4.610710  | 0.866239  | 1.862633  |
| 5  | 6 | 0 | 3.986625  | -1.356603 | 1.786767  |
| 6  | 6 | 0 | 3.511427  | -0.030693 | 2.019853  |
| 7  | 6 | 0 | 5.031866  | 0.447245  | -1.739571 |
| 8  | 6 | 0 | 3.857340  | 1.179514  | -1.407763 |
| 9  | 6 | 0 | 2.768770  | 0.245528  | -1.266507 |
| 10 | 6 | 0 | 3.306627  | -1.070684 | -1.501984 |
| 11 | 1 | 0 | 6.024168  | -2.111285 | 1.234414  |
| 12 | 1 | 0 | 4.568106  | 1.943469  | 1.946252  |
| 13 | 1 | 0 | 3.388248  | -2.257100 | 1.802489  |
| 14 | 1 | 0 | 2.486963  | 0.249655  | 2.223110  |
| 15 | 6 | 0 | 4.692522  | -0.939109 | -1.797915 |
| 16 | 1 | 0 | 6.017737  | 0.865832  | -1.887622 |
| 17 | 1 | 0 | 3.780599  | 2.248552  | -1.269140 |
| 18 | 1 | 0 | 2.743215  | -1.991212 | -1.446616 |
| 19 | 1 | 0 | 5.376608  | -1.752185 | -1.997623 |
| 20 | 6 | 0 | 1.419904  | 0.562724  | -0.969670 |
| 21 | 6 | 0 | 0.258956  | 0.837304  | -0.725070 |
| 22 | 6 | 0 | -1.089925 | 1.184588  | -0.440152 |
| 23 | 6 | 0 | -2.106839 | 0.192059  | -0.355039 |
| 24 | 6 | 0 | -1.426988 | 2.537868  | -0.232446 |
| 25 | 6 | 0 | -3.444735 | 0.590875  | -0.055985 |
| 26 | 6 | 0 | -1.834913 | -1.201933 | -0.559542 |
| 27 | 6 | 0 | -2.727706 | 2.920368  | 0.055964  |
| 28 | 1 | 0 | -0.642587 | 3.284479  | -0.302606 |
| 29 | 6 | 0 | -4.478030 | -0.391193 | 0.037406  |
| 30 | 6 | 0 | -3.758389 | 1.969091  | 0.152337  |
| 31 | 6 | 0 | -2.821543 | -2.137575 | -0.471498 |
| 32 | 1 | 0 | -0.815756 | -1.494462 | -0.790016 |
| 33 | 1 | 0 | -2.960001 | 3.970537  | 0.211643  |
| 34 | 6 | 0 | -4.176648 | -1.771529 | -0.169847 |
| 35 | 6 | 0 | -5.818203 | 0.003578  | 0.339083  |
| 36 | 6 | 0 | -5.112827 | 2.335709  | 0.452587  |
| 37 | 1 | 0 | -2.594002 | -3.188476 | -0.630893 |
| 38 | 6 | 0 | -5.208835 | -2.719778 | -0.072391 |
| 39 | 6 | 0 | -6.816526 | -0.980761 | 0.426800  |
| 40 | 6 | 0 | -6.097274 | 1.398134  | 0.542477  |
| 41 | 1 | 0 | -5.338955 | 3.387378  | 0.608452  |
| 42 | 6 | 0 | -6.512547 | -2.325802 | 0.222921  |
| 43 | 1 | 0 | -4.978315 | -3.770081 | -0.230367 |
| 44 | 1 | 0 | -7.835545 | -0.680712 | 0.656614  |
| 45 | 1 | 0 | -7.118272 | 1.692504  | 0.771025  |
| 46 | 1 | 0 | -7.298092 | -3.072539 | 0.294848  |
| 47 | 1 | 0 | 6.753170  | 0.484767  | 1.323606  |

-----  
Total energy (Sum of electronic and zero-point energies):

-1201.2639259 Hartree

Ferrocenyl substituted pyrene **3b**

Standard orientation:

| Center<br>Number | Atomic<br>Number | Atomic<br>Type | Coordinates (Angstroms) |           |           |
|------------------|------------------|----------------|-------------------------|-----------|-----------|
|                  |                  |                | X                       | Y         | Z         |
| 1                | 6                | 0              | 0.864643                | 2.416220  | -0.315537 |
| 2                | 6                | 0              | 0.707433                | 1.021853  | -0.439119 |
| 3                | 6                | 0              | 2.131842                | 2.981854  | -0.430907 |
| 4                | 6                | 0              | 1.843164                | 0.223824  | -0.680209 |
| 5                | 6                | 0              | 3.249082                | 2.181462  | -0.662212 |
| 6                | 1                | 0              | 2.251364                | 4.057203  | -0.333757 |
| 7                | 6                | 0              | 3.120423                | 0.786248  | -0.789591 |
| 8                | 1                | 0              | 1.711435                | -0.845984 | -0.801649 |
| 9                | 1                | 0              | 4.232697                | 2.635691  | -0.730336 |
| 10               | 6                | 0              | 4.291645                | -0.069114 | -1.065366 |
| 11               | 26               | 0              | 5.959828                | -0.391390 | 0.155089  |
| 12               | 6                | 0              | 4.427985                | -1.463563 | -0.752297 |
| 13               | 6                | 0              | 5.499059                | 0.327243  | -1.735413 |
| 14               | 6                | 0              | 5.692167                | -1.916062 | -1.231205 |
| 15               | 6                | 0              | 6.354075                | -0.808309 | -1.840659 |
| 16               | 6                | 0              | 5.725479                | 0.706775  | 1.903326  |
| 17               | 6                | 0              | 6.918739                | 1.106979  | 1.228739  |
| 18               | 6                | 0              | 7.768570                | -0.035667 | 1.118739  |
| 19               | 6                | 0              | 7.100206                | -1.141780 | 1.725353  |
| 20               | 1                | 0              | 3.710331                | -2.059891 | -0.206061 |
| 21               | 1                | 0              | 5.720471                | 1.320333  | -2.100701 |
| 22               | 1                | 0              | 6.094065                | -2.913183 | -1.115874 |
| 23               | 1                | 0              | 7.342107                | -0.818968 | -2.279864 |
| 24               | 6                | 0              | 5.837504                | -0.683077 | 2.209863  |
| 25               | 1                | 0              | 4.868292                | 1.334487  | 2.104937  |
| 26               | 1                | 0              | 7.130563                | 2.094682  | 0.842801  |
| 27               | 1                | 0              | 8.733782                | -0.065976 | 0.632053  |
| 28               | 1                | 0              | 7.471112                | -2.156203 | 1.778926  |
| 29               | 1                | 0              | 5.084454                | -1.288840 | 2.694926  |
| 30               | 1                | 0              | -0.005516               | 3.037904  | -0.132764 |
| 31               | 6                | 0              | -0.580617               | 0.422713  | -0.334815 |
| 32               | 6                | 0              | -1.679459               | -0.096056 | -0.251047 |
| 33               | 6                | 0              | -2.948685               | -0.728951 | -0.159139 |
| 34               | 6                | 0              | -4.147979               | 0.029942  | -0.047378 |
| 35               | 6                | 0              | -3.021076               | -2.136972 | -0.182901 |
| 36               | 6                | 0              | -5.398067               | -0.654653 | 0.036389  |
| 37               | 6                | 0              | -4.146995               | 1.464389  | -0.018417 |
| 38               | 6                | 0              | -4.236845               | -2.797056 | -0.099513 |
| 39               | 1                | 0              | -2.098791               | -2.702176 | -0.268767 |
| 40               | 6                | 0              | -6.612880               | 0.088899  | 0.144997  |
| 41               | 6                | 0              | -5.442790               | -2.082472 | 0.010324  |
| 42               | 6                | 0              | -5.306412               | 2.172489  | 0.085915  |
| 43               | 1                | 0              | -3.192236               | 1.975488  | -0.083446 |
| 44               | 1                | 0              | -4.264786               | -3.883200 | -0.119785 |
| 45               | 6                | 0              | -6.580352               | 1.516102  | 0.170892  |

|    |   |   |            |           |          |
|----|---|---|------------|-----------|----------|
| 46 | 6 | 0 | -7.866499  | -0.592386 | 0.227129 |
| 47 | 6 | 0 | -6.715804  | -2.739171 | 0.095808 |
| 48 | 1 | 0 | -5.283213  | 3.259037  | 0.105608 |
| 49 | 6 | 0 | -7.787758  | 2.226685  | 0.276944 |
| 50 | 6 | 0 | -9.047481  | 0.160929  | 0.331853 |
| 51 | 6 | 0 | -7.873784  | -2.028717 | 0.199153 |
| 52 | 1 | 0 | -6.736937  | -3.825672 | 0.075539 |
| 53 | 6 | 0 | -9.005670  | 1.554044  | 0.356184 |
| 54 | 1 | 0 | -7.761678  | 3.313012  | 0.296241 |
| 55 | 1 | 0 | -10.000841 | -0.357149 | 0.394208 |
| 56 | 1 | 0 | -8.829877  | -2.541761 | 0.262621 |
| 57 | 1 | 0 | -9.929507  | 2.119457  | 0.437542 |

-----

Total energy (Sum of electronic and zero-point energies):

-1432.3228567 Hartree

Ferrocenyl substituted pyrene **3c**

Standard orientation:

| Center<br>Number | Atomic<br>Number | Atomic<br>Type | Coordinates (Angstroms) |           |           |
|------------------|------------------|----------------|-------------------------|-----------|-----------|
|                  |                  |                | X                       | Y         | Z         |
| 1                | 6                | 0              | 7.770067                | 0.656254  | -1.493562 |
| 2                | 26               | 0              | 6.359847                | -0.067205 | -0.146766 |
| 3                | 6                | 0              | 7.865368                | 1.362391  | -0.256371 |
| 4                | 6                | 0              | 6.452647                | 0.848762  | -2.010601 |
| 5                | 6                | 0              | 6.607406                | 1.991834  | -0.009208 |
| 6                | 6                | 0              | 5.734629                | 1.674828  | -1.093548 |
| 7                | 6                | 0              | 6.710631                | -2.094908 | 0.140665  |
| 8                | 6                | 0              | 5.385676                | -1.887983 | -0.340844 |
| 9                | 6                | 0              | 4.676743                | -1.064264 | 0.600611  |
| 10               | 6                | 0              | 5.600981                | -0.758400 | 1.657787  |
| 11               | 1                | 0              | 8.727595                | 1.388052  | 0.395846  |
| 12               | 1                | 0              | 6.060330                | 0.421521  | -2.923273 |
| 13               | 1                | 0              | 6.350489                | 2.578946  | 0.861834  |
| 14               | 1                | 0              | 4.697755                | 1.969450  | -1.181177 |
| 15               | 6                | 0              | 6.844018                | -1.395836 | 1.377258  |
| 16               | 1                | 0              | 7.486023                | -2.657909 | -0.360232 |
| 17               | 1                | 0              | 4.984210                | -2.288244 | -1.260987 |
| 18               | 1                | 0              | 5.402327                | -0.121497 | 2.508177  |
| 19               | 1                | 0              | 7.740258                | -1.329468 | 1.978503  |
| 20               | 1                | 0              | 8.547671                | 0.053669  | -1.942518 |
| 21               | 6                | 0              | 3.267645                | -0.641706 | 0.514522  |
| 22               | 6                | 0              | 2.545083                | -0.736604 | -0.689442 |
| 23               | 6                | 0              | 2.587394                | -0.159457 | 1.646789  |
| 24               | 6                | 0              | 1.206682                | -0.373173 | -0.760001 |
| 25               | 1                | 0              | 3.041726                | -1.092961 | -1.586506 |

|    |   |   |            |           |           |
|----|---|---|------------|-----------|-----------|
| 26 | 6 | 0 | 1.251046   | 0.216794  | 1.583120  |
| 27 | 1 | 0 | 3.106653   | -0.096108 | 2.597740  |
| 28 | 6 | 0 | 0.530901   | 0.112667  | 0.377574  |
| 29 | 1 | 0 | 0.668540   | -0.456899 | -1.698864 |
| 30 | 1 | 0 | 0.745552   | 0.581386  | 2.471632  |
| 31 | 6 | 0 | -0.847029  | 0.476908  | 0.313280  |
| 32 | 6 | 0 | -2.025387  | 0.779561  | 0.264902  |
| 33 | 6 | 0 | -3.401827  | 1.146807  | 0.212066  |
| 34 | 6 | 0 | -4.417767  | 0.163628  | 0.055115  |
| 35 | 6 | 0 | -3.763061  | 2.503991  | 0.319569  |
| 36 | 6 | 0 | -5.783690  | 0.576687  | 0.008610  |
| 37 | 6 | 0 | -4.118640  | -1.236283 | -0.052431 |
| 38 | 6 | 0 | -5.091052  | 2.901684  | 0.270826  |
| 39 | 1 | 0 | -2.977143  | 3.242562  | 0.439268  |
| 40 | 6 | 0 | -6.818576  | -0.396174 | -0.142455 |
| 41 | 6 | 0 | -6.123044  | 1.960367  | 0.115700  |
| 42 | 6 | 0 | -5.106984  | -2.162868 | -0.195708 |
| 43 | 1 | 0 | -3.077892  | -1.540595 | -0.013780 |
| 44 | 1 | 0 | -5.342956  | 3.955555  | 0.353450  |
| 45 | 6 | 0 | -6.490474  | -1.782031 | -0.245766 |
| 46 | 6 | 0 | -8.186980  | 0.012899  | -0.188712 |
| 47 | 6 | 0 | -7.506030  | 2.341842  | 0.063533  |
| 48 | 1 | 0 | -4.858933  | -3.218288 | -0.273734 |
| 49 | 6 | 0 | -7.525083  | -2.721333 | -0.390453 |
| 50 | 6 | 0 | -9.186854  | -0.962662 | -0.335147 |
| 51 | 6 | 0 | -8.491815  | 1.413034  | -0.081991 |
| 52 | 1 | 0 | -7.752290  | 3.397390  | 0.144380  |
| 53 | 6 | 0 | -8.856921  | -2.313439 | -0.434173 |
| 54 | 1 | 0 | -7.274316  | -3.775974 | -0.467995 |
| 55 | 1 | 0 | -10.227641 | -0.651540 | -0.369919 |
| 56 | 1 | 0 | -9.534168  | 1.718924  | -0.119012 |
| 57 | 1 | 0 | -9.644048  | -3.053530 | -0.546008 |

-----  
Total energy (Sum of electronic and zero-point energies):

-1432.322145 Hartree

#### Ferrocenyl substituted pyrene **4a**

Standard orientation:

| Center<br>Number | Atomic<br>Number | Atomic<br>Type | Coordinates (Angstroms) |           |           |
|------------------|------------------|----------------|-------------------------|-----------|-----------|
|                  |                  |                | X                       | Y         | Z         |
| 1                | 6                | 0              | -7.395987               | -0.207466 | 0.210456  |
| 2                | 6                | 0              | -6.539892               | 0.881439  | 0.360814  |
| 3                | 6                | 0              | -5.148636               | 0.722168  | 0.248437  |
| 4                | 6                | 0              | -4.612522               | -0.570844 | -0.021973 |
| 5                | 6                | 0              | -5.497250               | -1.683816 | -0.160658 |
| 6                | 6                | 0              | -6.882031               | -1.477283 | -0.045980 |

|    |    |   |           |           |           |
|----|----|---|-----------|-----------|-----------|
| 7  | 6  | 0 | -4.236185 | 1.811718  | 0.424302  |
| 8  | 6  | 0 | -3.201000 | -0.752531 | -0.145690 |
| 9  | 6  | 0 | -2.317496 | 0.370526  | -0.035290 |
| 10 | 6  | 0 | -2.890501 | 1.645130  | 0.293736  |
| 11 | 6  | 0 | -0.915151 | 0.151692  | -0.181651 |
| 12 | 6  | 0 | -0.433765 | -1.166275 | -0.332656 |
| 13 | 6  | 0 | -1.291743 | -2.245488 | -0.442871 |
| 14 | 6  | 0 | -2.684394 | -2.065188 | -0.372020 |
| 15 | 6  | 0 | -3.594013 | -3.165820 | -0.503224 |
| 16 | 6  | 0 | -4.940702 | -2.982663 | -0.408400 |
| 17 | 1  | 0 | -5.618882 | -3.825426 | -0.512382 |
| 18 | 1  | 0 | -3.182757 | -4.155682 | -0.680425 |
| 19 | 1  | 0 | -4.636865 | 2.788411  | 0.680104  |
| 20 | 1  | 0 | -8.469113 | -0.066817 | 0.297454  |
| 21 | 1  | 0 | -6.943160 | 1.868552  | 0.569245  |
| 22 | 1  | 0 | -7.553068 | -2.324568 | -0.158364 |
| 23 | 1  | 0 | -2.236721 | 2.488830  | 0.471731  |
| 24 | 1  | 0 | 0.636263  | -1.328353 | -0.410791 |
| 25 | 1  | 0 | -0.891950 | -3.244355 | -0.593075 |
| 26 | 6  | 0 | 0.090906  | 1.227331  | -0.211149 |
| 27 | 6  | 0 | -0.012413 | 2.362687  | -0.981315 |
| 28 | 6  | 0 | 1.243884  | 1.002203  | 1.956892  |
| 29 | 6  | 0 | 2.337217  | 0.720085  | 2.835434  |
| 30 | 6  | 0 | 0.001590  | 1.268721  | 2.617900  |
| 31 | 6  | 0 | -1.056628 | 2.572091  | -1.939032 |
| 32 | 6  | 0 | 0.958566  | 3.415947  | -0.913425 |
| 33 | 7  | 0 | 3.201567  | 0.470061  | 3.574083  |
| 34 | 7  | 0 | -0.987016 | 1.503263  | 3.186044  |
| 35 | 7  | 0 | -1.866499 | 2.768112  | -2.751066 |
| 36 | 7  | 0 | 1.726653  | 4.288920  | -0.866170 |
| 37 | 6  | 0 | 1.354792  | 1.029725  | 0.584650  |
| 38 | 6  | 0 | 2.602809  | 0.917628  | -0.161072 |
| 39 | 26 | 0 | 3.840913  | -0.752007 | -0.388932 |
| 40 | 6  | 0 | 2.701690  | 0.551394  | -1.556249 |
| 41 | 6  | 0 | 3.947395  | 1.198957  | 0.293462  |
| 42 | 6  | 0 | 4.061759  | 0.634006  | -1.944625 |
| 43 | 6  | 0 | 4.824916  | 1.042912  | -0.809081 |
| 44 | 6  | 0 | 3.137242  | -2.387044 | 0.698436  |
| 45 | 6  | 0 | 4.431969  | -2.007751 | 1.162013  |
| 46 | 6  | 0 | 5.337338  | -2.118338 | 0.063480  |
| 47 | 6  | 0 | 4.601498  | -2.559555 | -1.077243 |
| 48 | 1  | 0 | 1.877604  | 0.260103  | -2.191733 |
| 49 | 1  | 0 | 4.233158  | 1.498161  | 1.289464  |
| 50 | 1  | 0 | 4.455016  | 0.395943  | -2.922898 |
| 51 | 1  | 0 | 5.897195  | 1.177147  | -0.779557 |
| 52 | 6  | 0 | 3.238734  | -2.726465 | -0.684960 |
| 53 | 1  | 0 | 2.230470  | -2.379581 | 1.288161  |
| 54 | 1  | 0 | 4.667698  | -1.655216 | 2.156337  |
| 55 | 1  | 0 | 6.389461  | -1.869475 | 0.081271  |
| 56 | 1  | 0 | 4.998901  | -2.709184 | -2.071694 |
| 57 | 1  | 0 | 2.428080  | -3.037793 | -1.329539 |

Total energy (Sum of electronic and zero-point energies):

-1648.8337766 Hartree

Ferrocenyl substituted pyrene **4b**

Standard orientation:

| Center<br>Number | Atomic<br>Number | Atomic<br>Type | Coordinates (Angstroms) |           |           |
|------------------|------------------|----------------|-------------------------|-----------|-----------|
|                  |                  |                | X                       | Y         | Z         |
| 1                | 6                | 0              | -6.044450               | -3.447049 | -1.905875 |
| 2                | 6                | 0              | -4.781466               | -2.965539 | -2.240959 |
| 3                | 6                | 0              | -4.134568               | -2.021131 | -1.425500 |
| 4                | 6                | 0              | -4.780597               | -1.554817 | -0.243228 |
| 5                | 6                | 0              | -6.074448               | -2.058647 | 0.094103  |
| 6                | 6                | 0              | -6.684823               | -2.999669 | -0.751022 |
| 7                | 6                | 0              | -2.834114               | -1.507871 | -1.732629 |
| 8                | 6                | 0              | -4.140131               | -0.593090 | 0.597553  |
| 9                | 6                | 0              | -2.847908               | -0.078706 | 0.254469  |
| 10               | 6                | 0              | -2.220260               | -0.590998 | -0.931893 |
| 11               | 6                | 0              | -2.235296               | 0.873706  | 1.124021  |
| 12               | 6                | 0              | -2.909222               | 1.266304  | 2.298277  |
| 13               | 6                | 0              | -4.161063               | 0.775727  | 2.619049  |
| 14               | 6                | 0              | -4.802308               | -0.155997 | 1.786225  |
| 15               | 6                | 0              | -6.101598               | -0.675657 | 2.099514  |
| 16               | 6                | 0              | -6.711441               | -1.585166 | 1.289693  |
| 17               | 1                | 0              | -7.696209               | -1.971012 | 1.539014  |
| 18               | 1                | 0              | -6.590662               | -0.325596 | 3.004019  |
| 19               | 1                | 0              | -2.330678               | -1.868740 | -2.625441 |
| 20               | 1                | 0              | -6.532960               | -4.175082 | -2.546342 |
| 21               | 1                | 0              | -4.282857               | -3.316818 | -3.140184 |
| 22               | 1                | 0              | -7.670299               | -3.378208 | -0.493488 |
| 23               | 1                | 0              | -1.230826               | -0.248310 | -1.203688 |
| 24               | 1                | 0              | -2.459295               | 2.016991  | 2.937705  |
| 25               | 1                | 0              | -4.664744               | 1.126381  | 3.514677  |
| 26               | 6                | 0              | -0.926838               | 1.500083  | 0.841771  |
| 27               | 6                | 0              | -0.639460               | 2.087943  | -0.501174 |
| 28               | 6                | 0              | 0.029891                | 1.587642  | 1.834440  |
| 29               | 6                | 0              | -1.612080               | 2.836340  | -1.128926 |
| 30               | 6                | 0              | 0.683394                | 1.841859  | -1.116822 |
| 31               | 6                | 0              | 1.338812                | 2.841367  | -1.858203 |
| 32               | 6                | 0              | 1.325703                | 0.602894  | -0.928451 |
| 33               | 6                | 0              | 2.593841                | 2.584960  | -2.401290 |
| 34               | 1                | 0              | 0.894555                | 3.821947  | -1.974357 |
| 35               | 6                | 0              | 2.591830                | 0.335733  | -1.463149 |
| 36               | 1                | 0              | 0.828595                | -0.169130 | -0.353069 |
| 37               | 6                | 0              | 3.212835                | 1.352151  | -2.211902 |
| 38               | 1                | 0              | 3.103463                | 3.363102  | -2.960767 |
| 39               | 1                | 0              | 4.200358                | 1.185059  | -2.628592 |

|    |    |   |           |           |           |
|----|----|---|-----------|-----------|-----------|
| 40 | 6  | 0 | 3.247314  | -0.965402 | -1.240068 |
| 41 | 26 | 0 | 4.747351  | -1.355656 | 0.153905  |
| 42 | 6  | 0 | 2.833007  | -1.992457 | -0.322078 |
| 43 | 6  | 0 | 4.433145  | -1.448172 | -1.894935 |
| 44 | 6  | 0 | 3.741793  | -3.084499 | -0.423470 |
| 45 | 6  | 0 | 4.730316  | -2.748020 | -1.395102 |
| 46 | 6  | 0 | 5.114755  | 0.375248  | 1.257415  |
| 47 | 6  | 0 | 6.289987  | -0.017415 | 0.547878  |
| 48 | 6  | 0 | 6.652742  | -1.328977 | 0.982705  |
| 49 | 6  | 0 | 5.699825  | -1.747401 | 1.959925  |
| 50 | 1  | 0 | 1.998688  | -1.940205 | 0.363003  |
| 51 | 1  | 0 | 5.011390  | -0.917862 | -2.638150 |
| 52 | 1  | 0 | 3.708344  | -3.991644 | 0.163762  |
| 53 | 1  | 0 | 5.576924  | -3.357051 | -1.680189 |
| 54 | 6  | 0 | 4.750534  | -0.694152 | 2.128997  |
| 55 | 1  | 0 | 4.571853  | 1.303049  | 1.135750  |
| 56 | 1  | 0 | 6.802481  | 0.565991  | -0.204787 |
| 57 | 1  | 0 | 7.483390  | -1.914611 | 0.613185  |
| 58 | 1  | 0 | 5.681405  | -2.706257 | 2.459579  |
| 59 | 1  | 0 | 3.890421  | -0.713195 | 2.784176  |
| 60 | 6  | 0 | -1.509901 | 3.281921  | -2.488453 |
| 61 | 6  | 0 | -2.826320 | 3.260821  | -0.494031 |
| 62 | 6  | 0 | -0.083059 | 0.893130  | 3.084223  |
| 63 | 6  | 0 | 1.230713  | 2.364800  | 1.729527  |
| 64 | 7  | 0 | -1.505253 | 3.648745  | -3.592967 |
| 65 | 7  | 0 | -3.811718 | 3.677197  | -0.035716 |
| 66 | 7  | 0 | -0.093875 | 0.326037  | 4.100766  |
| 67 | 7  | 0 | 2.216706  | 2.983372  | 1.720619  |

-----  
Total energy (Sum of electronic and zero-point energies):

-1879.8878569 Hartree





## HRMS spectra of **2**

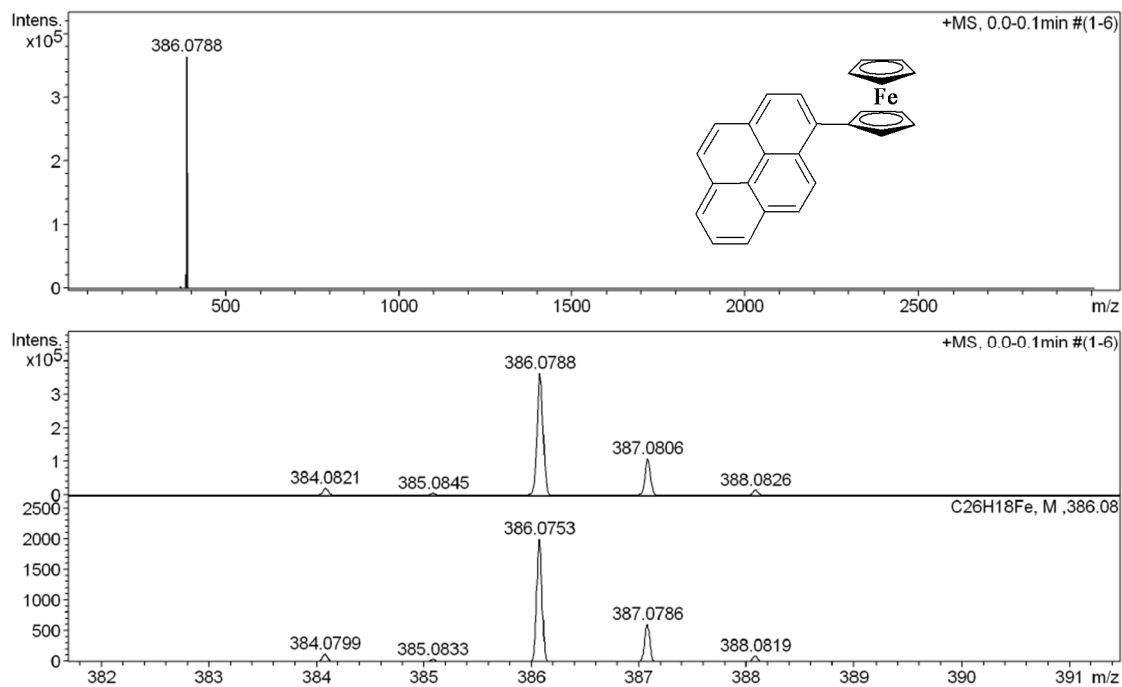

## <sup>1</sup>H NMR Spectra of **3a**

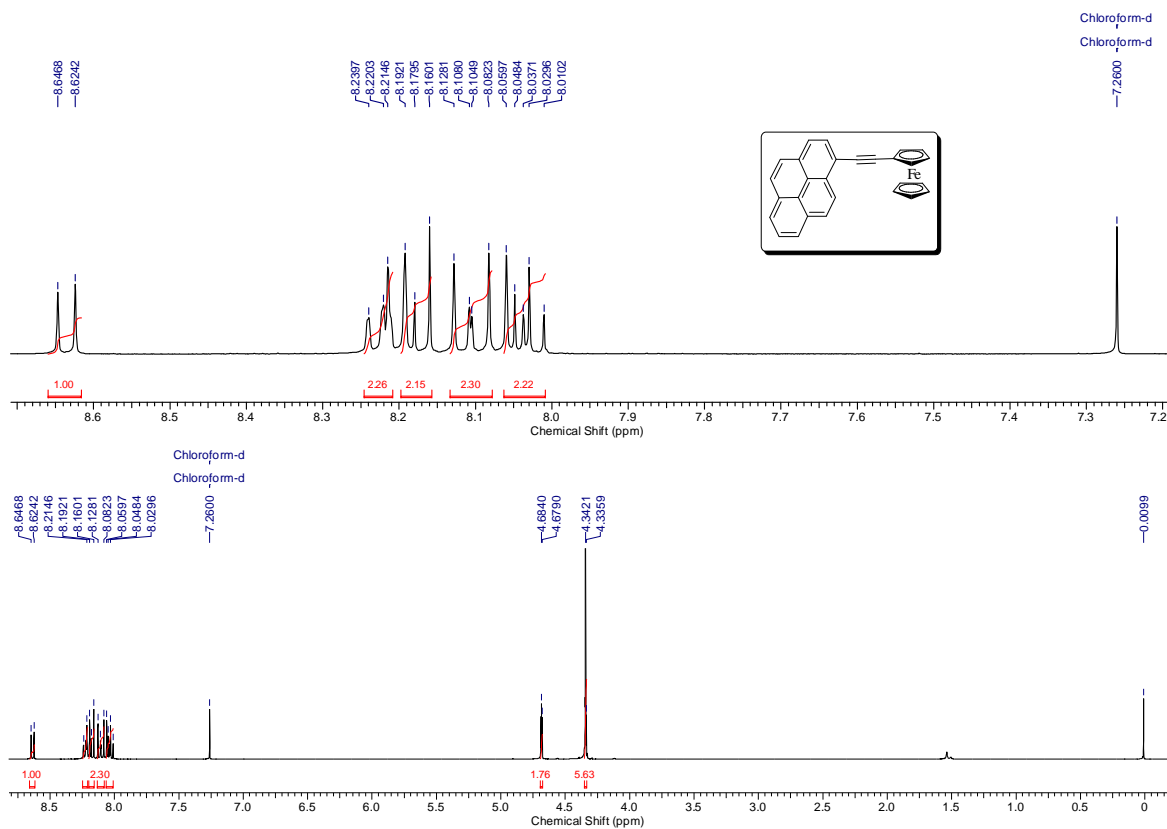

### <sup>13</sup>C NMR Spectra of 3a

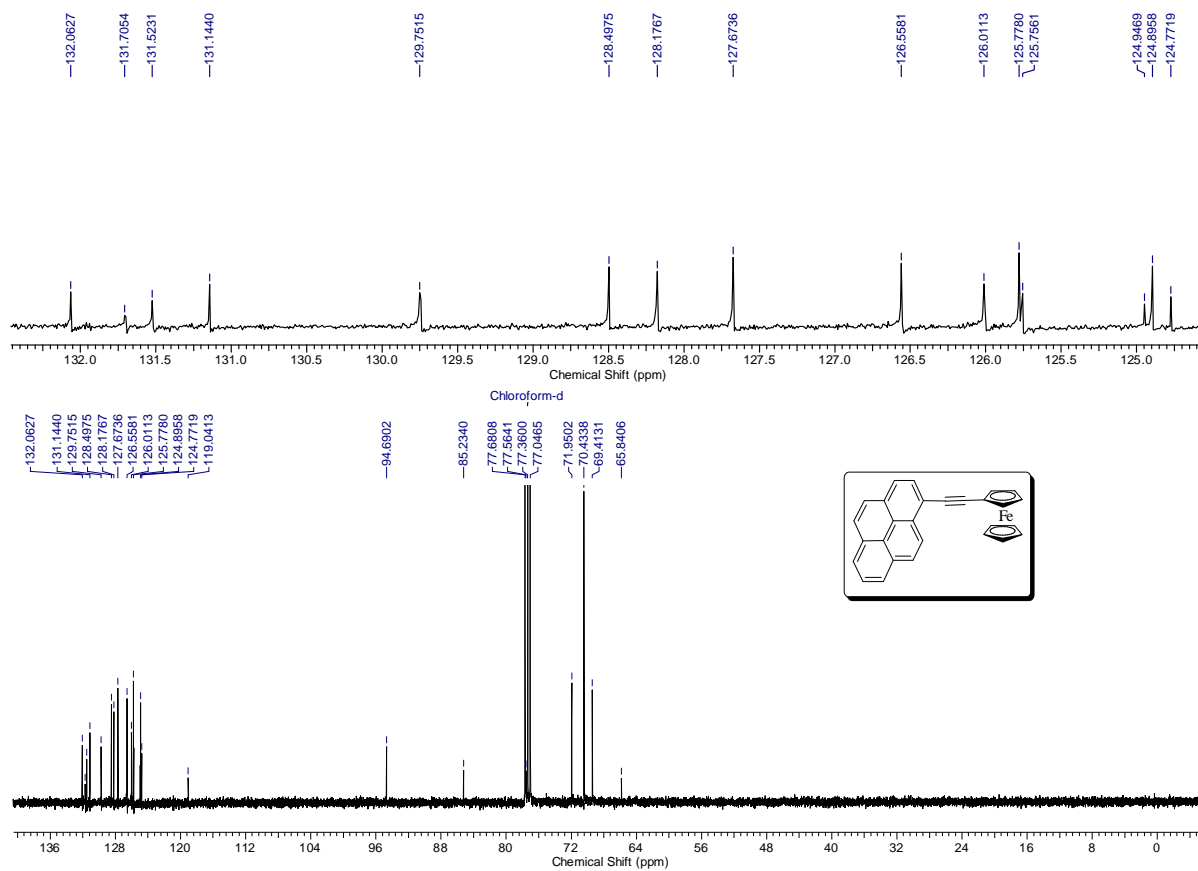

### HRMS of 3a

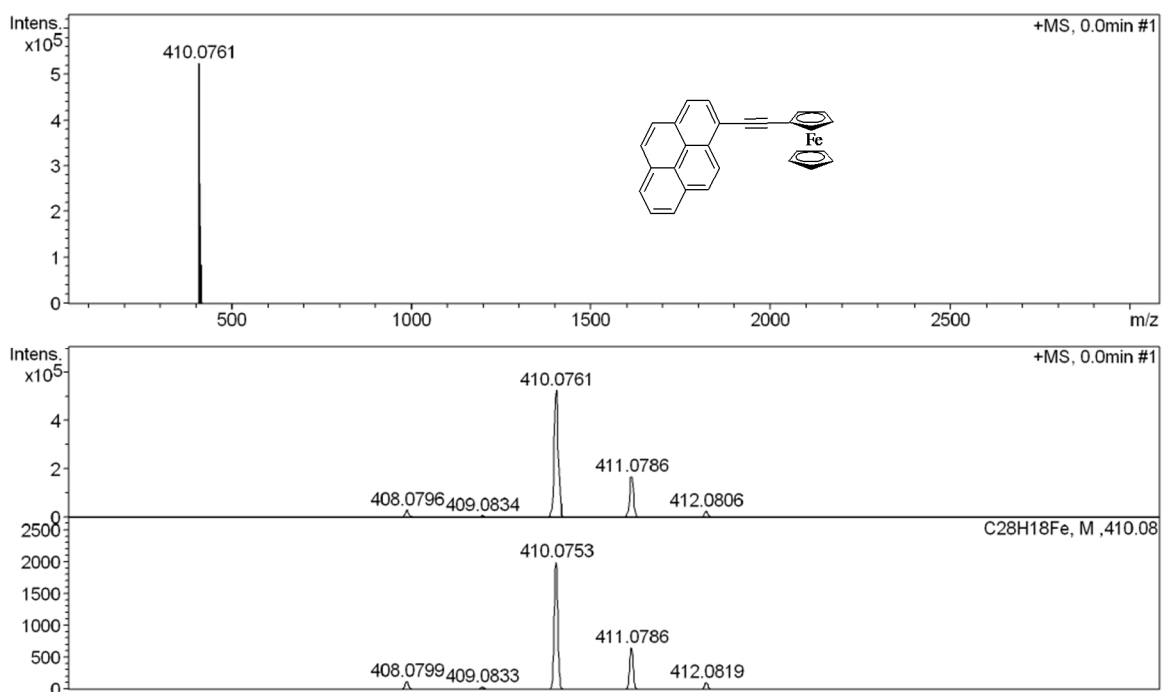

# <sup>1</sup>H NMR Spectra of **3b**

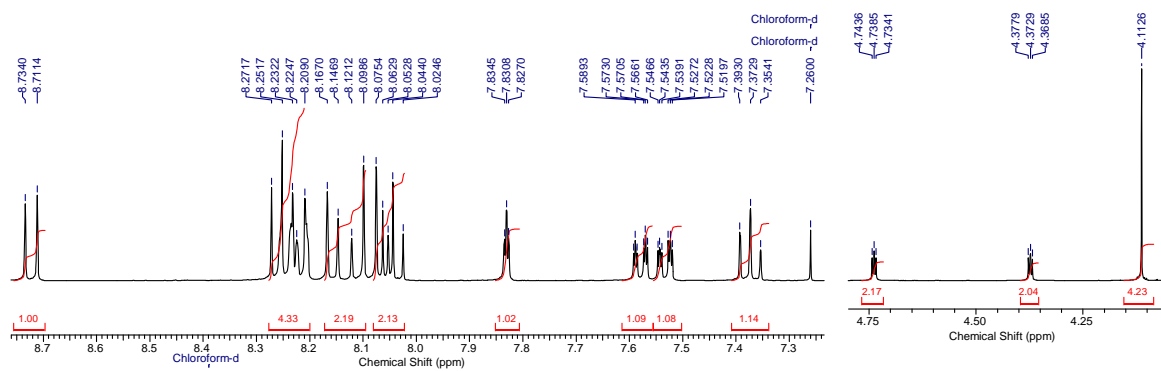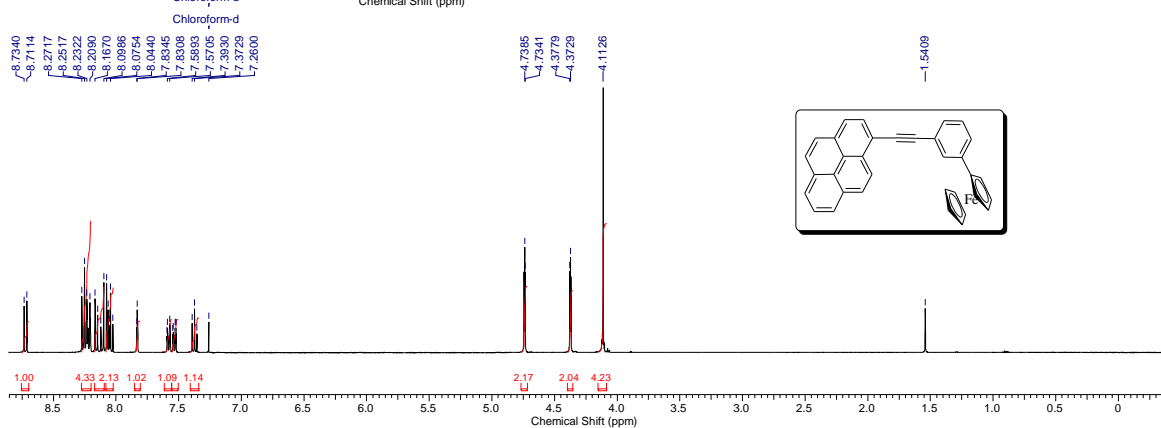

# <sup>13</sup>C NMR Spectra of **3b**

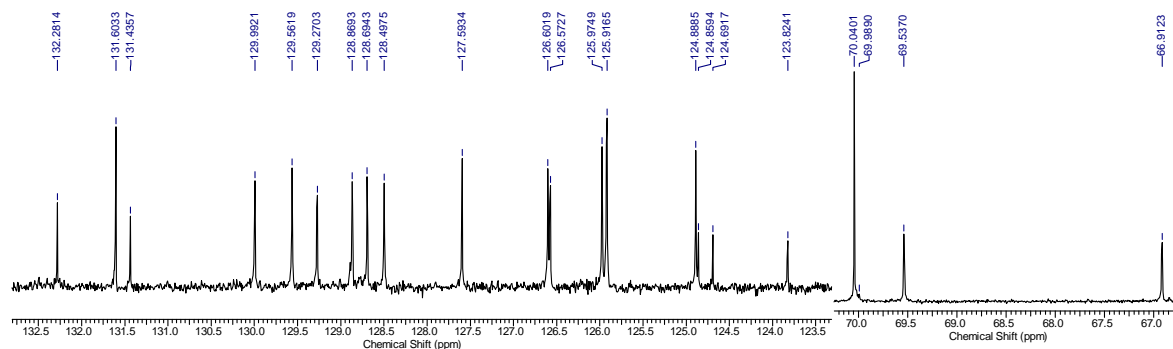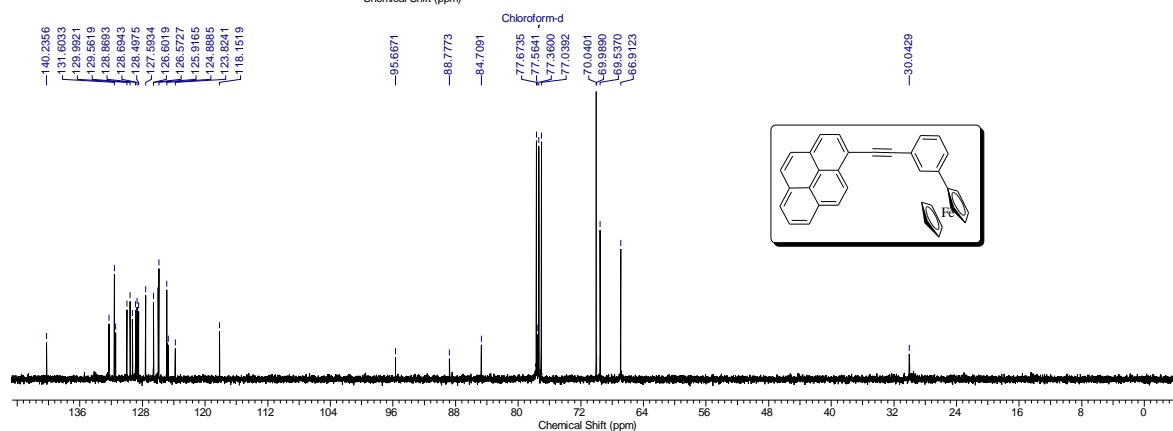

## HRMS of 3b

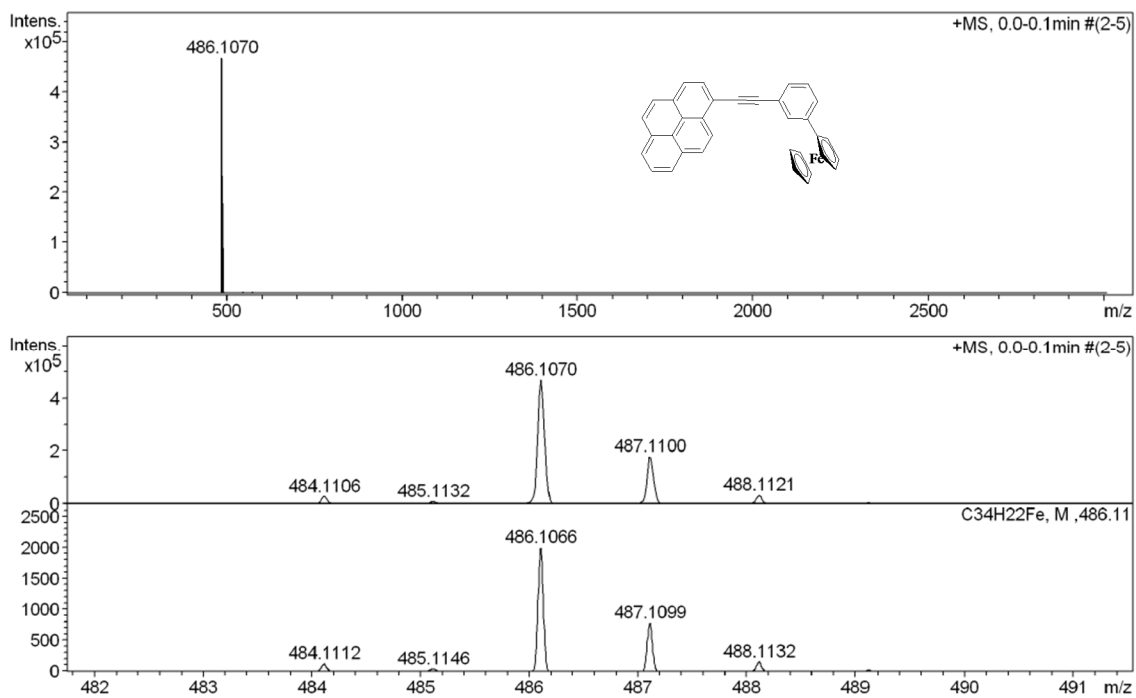

## <sup>1</sup>H NMR Spectra of 3c

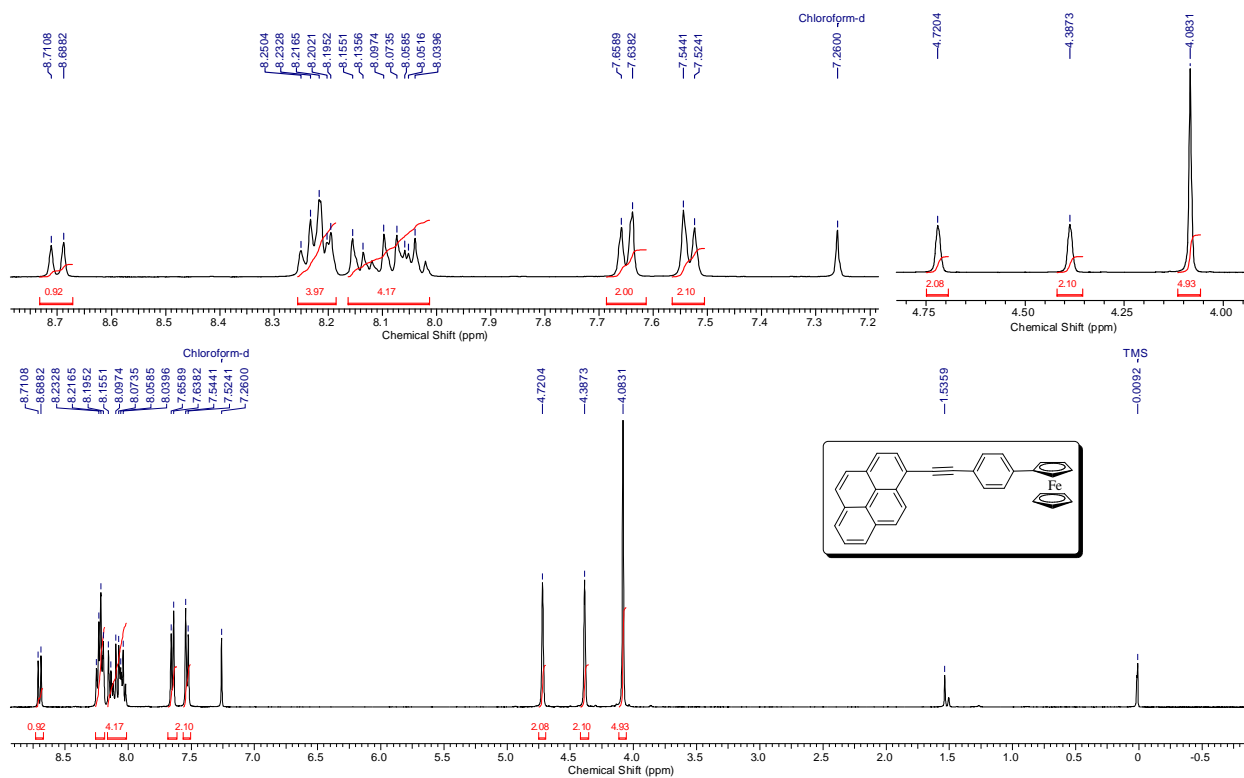

## HRMS of 3c

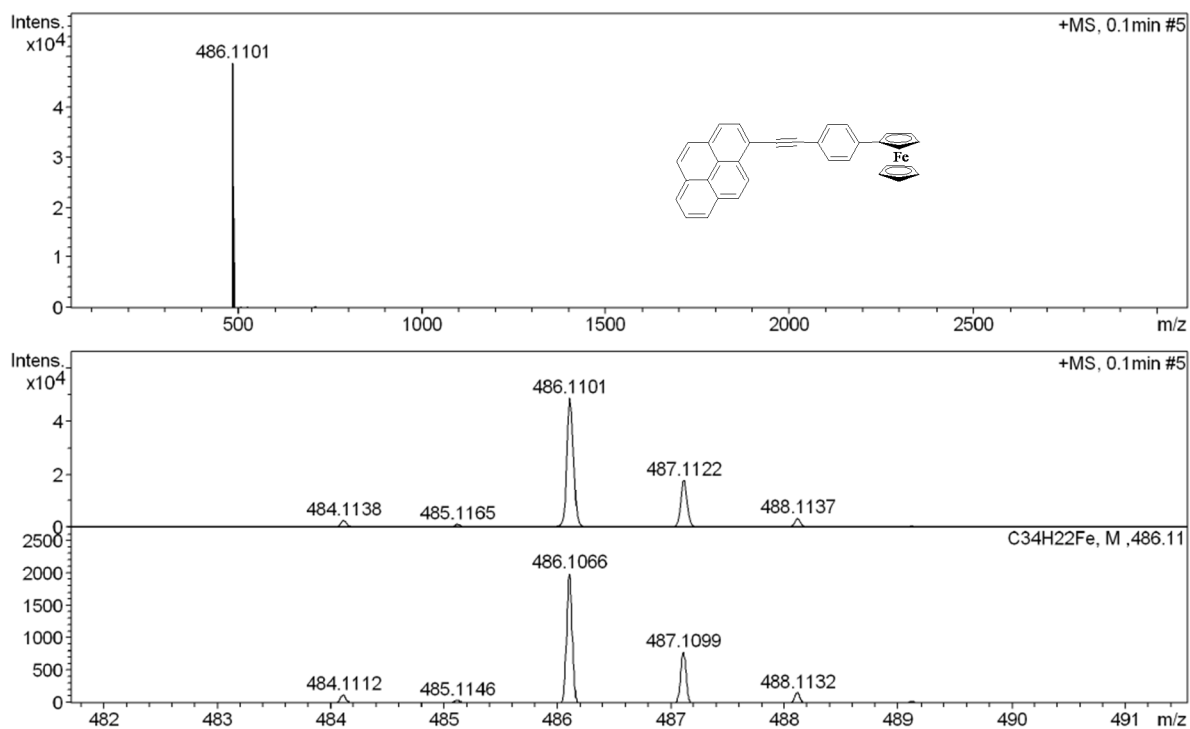

## $^1H$ NMR Spectra of 4a

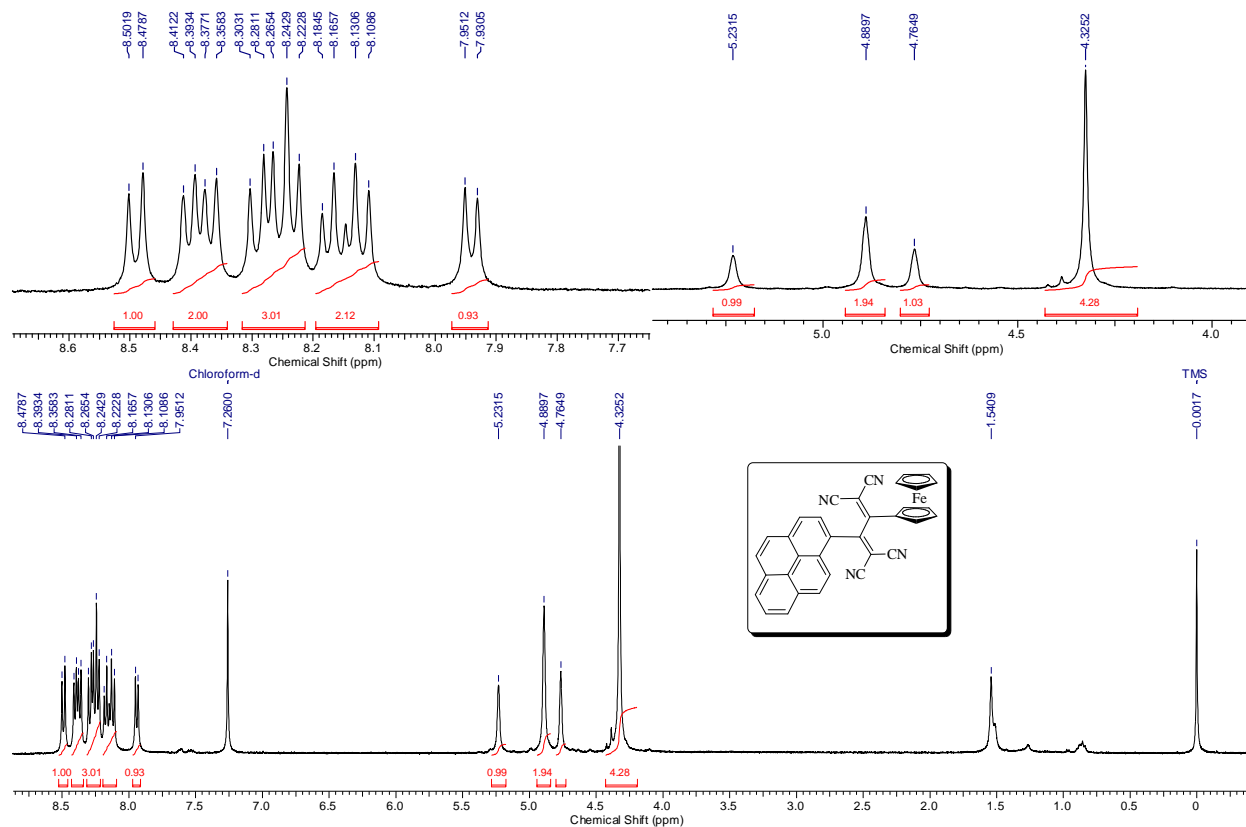

### <sup>13</sup>C NMR Spectra of 4a

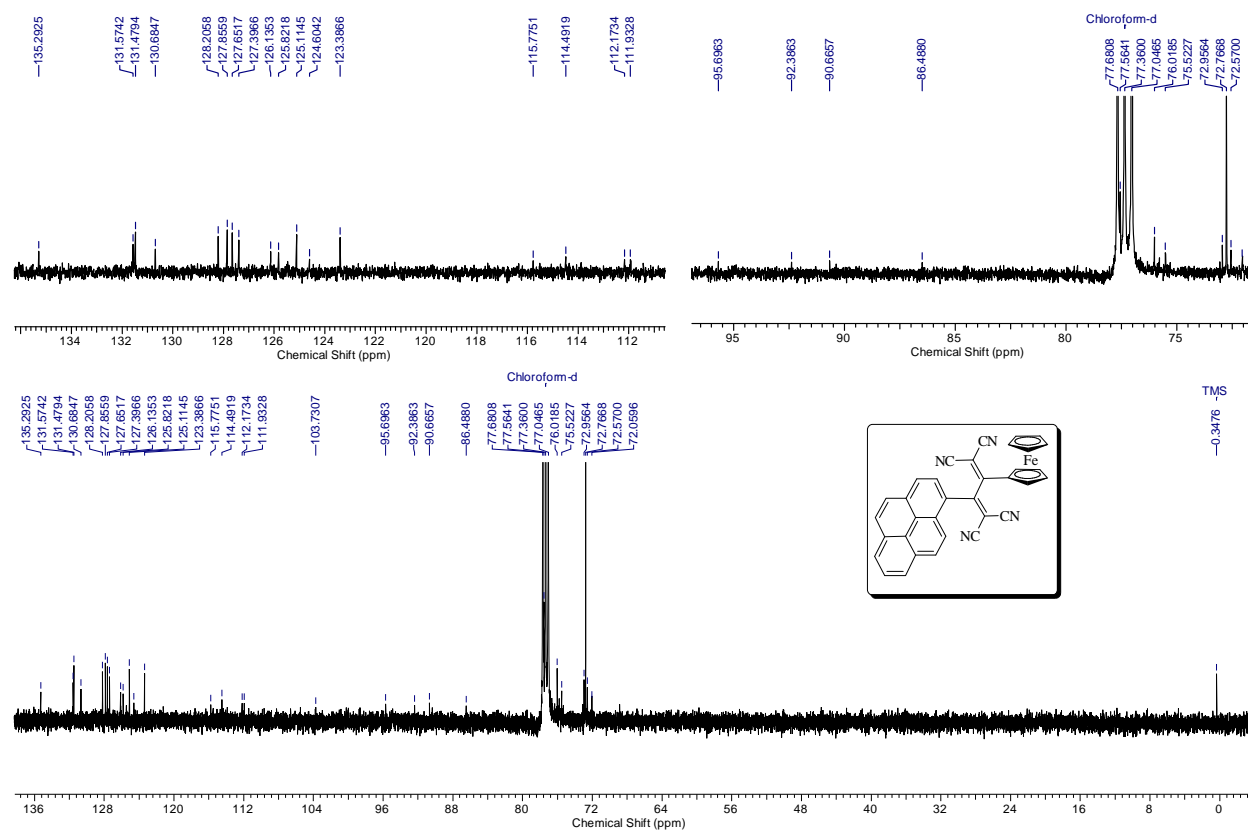

### HRMS of 4a

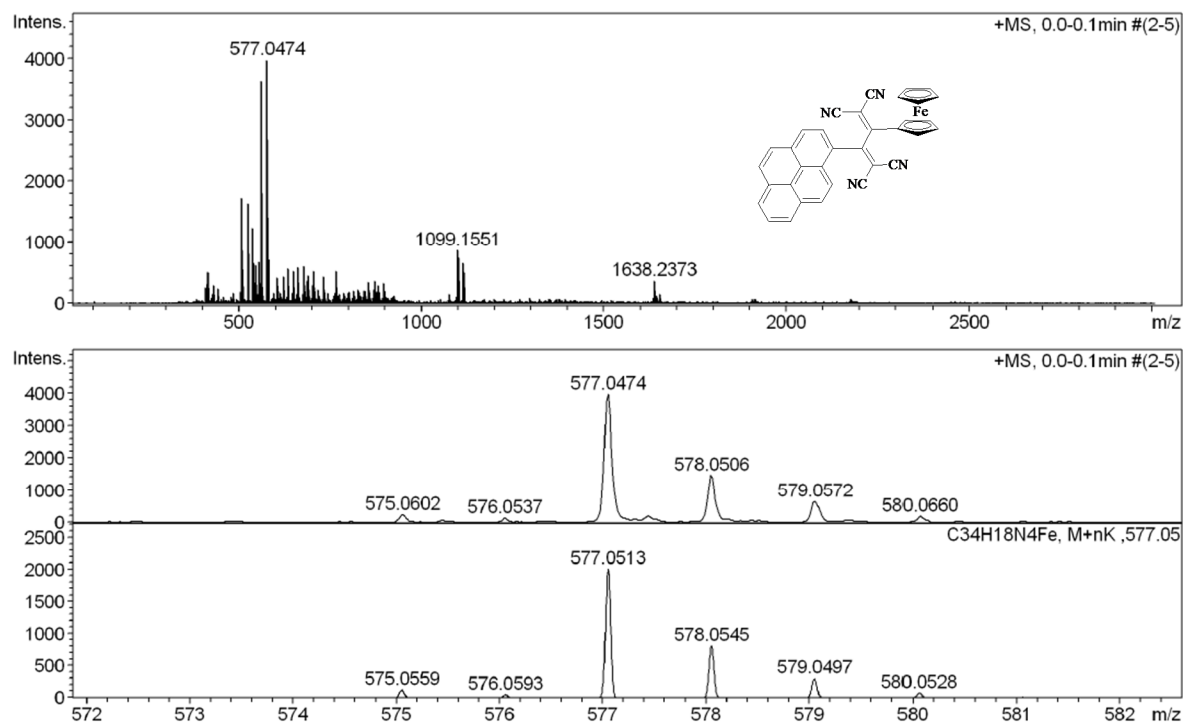

# <sup>1</sup>H NMR Spectra of 4b

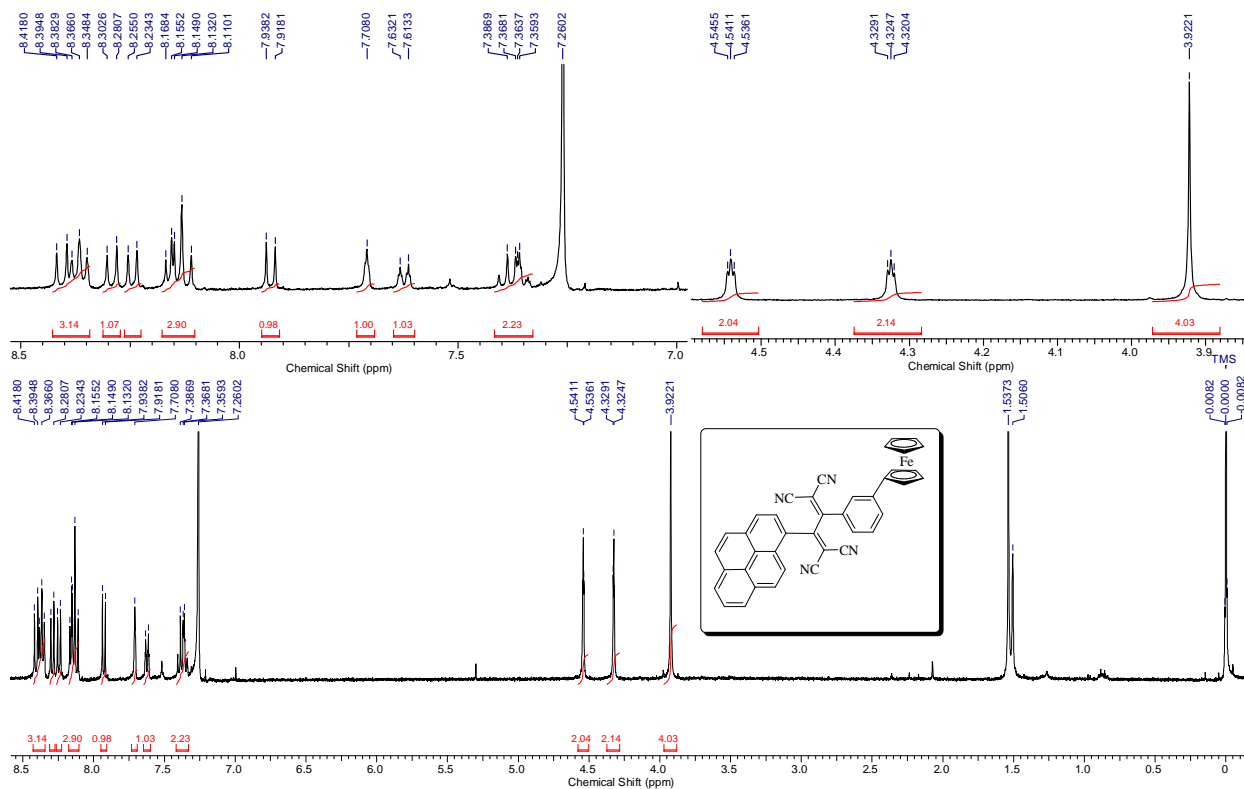

# HRMS of 4b

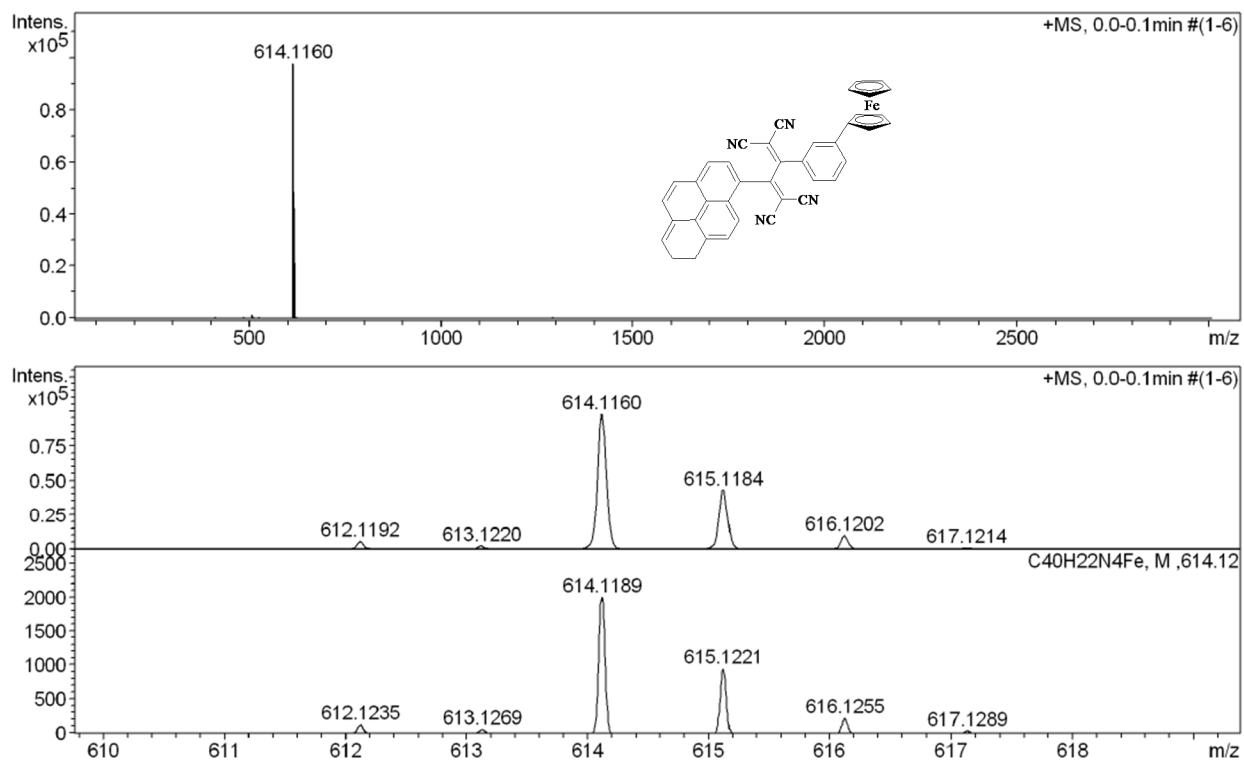



---

<sup>i</sup> (a) M. J. Frisch, G. W. Trucks, H. B. Schlegel, G. E. Scuseria, M. A. Robb, J. R. Cheeseman, G. Scalmani, V. Barone, B. Mennucci, G. A. Petersson, H. Nakatsuji, M. Caricato, X. Li, H. P. Hratchian, A. F. Izmaylov, J. Bloino, G. Zheng, J. L. Sonnenberg, M. Hada, M. Ehara, K. Toyota, R. Fukuda, J. Hasegawa, M. Ishida, T. Nakajima, Y. Honda, O. Kitao, H. Nakai, T. Vreven, J. A. Jr. Montgomery, J. E. Peralta, F. Ogliaro, M. Bearpark, J. J. Heyd, E. Brothers, K. N. Kudin, V. N. Staroverov, R. Kobayashi, J. Normand, K. Raghavachari, A. Rendell, J. C. Burant, S. S. Iyengar, J. Tomasi, M. Cossi, N. Rega, N. J. Millam, M. Klene, J. E. Knox, J. B. Cross, V. Bakken, C. Adamo, J. Jaramillo, R. Gomperts, R. E. Stratmann, O. Yazyev, A. J. Austin, R. Cammi, C. Pomelli, J. W. Ochterski, R. L. Martin, K. Morokuma, V. G. Zakrzewski, G. A. Voth, P. Salvador, J. J. Dannenberg, S. Dapprich, A. D. Daniels, O. Farkas, J. B. Foresman, J. V. Ortiz, J. Cioslowski and D. J. Fox, *Gaussian 09*, revision A.02; Gaussian, Inc.: Wallingford, CT, **2009**; (b) C. Lee, W. Yang and R. G. Parr, *Phys. Rev. B*, 1988, **37**, 785–789; (c) A. D. Becke, *J. Chem. Phys.*, 1993, **98**, 1372–1377; (d) P. J. Hay and W. R. Wadt, *J. Chem. Phys.*, 1985, **82**, 270-283; (e) M. M. Francl, W. J. Pietro, W. J. Hehre, J. S. Binkley, M. S. Gordon, D. J. Defrees and J. A. Pople, *J. Chem. Phys.*, 1982, **77**, 3654-3665.
